# Supplementary material for: Diversification of CYCLOIDEA-like genes in Dipsacaceae (Dipsacales): implications for the evolution of capitulum inflorescences
Source: Springer Nature journal article supplement (doi:10.1186/1471-2148-11-325), 2011-01-01

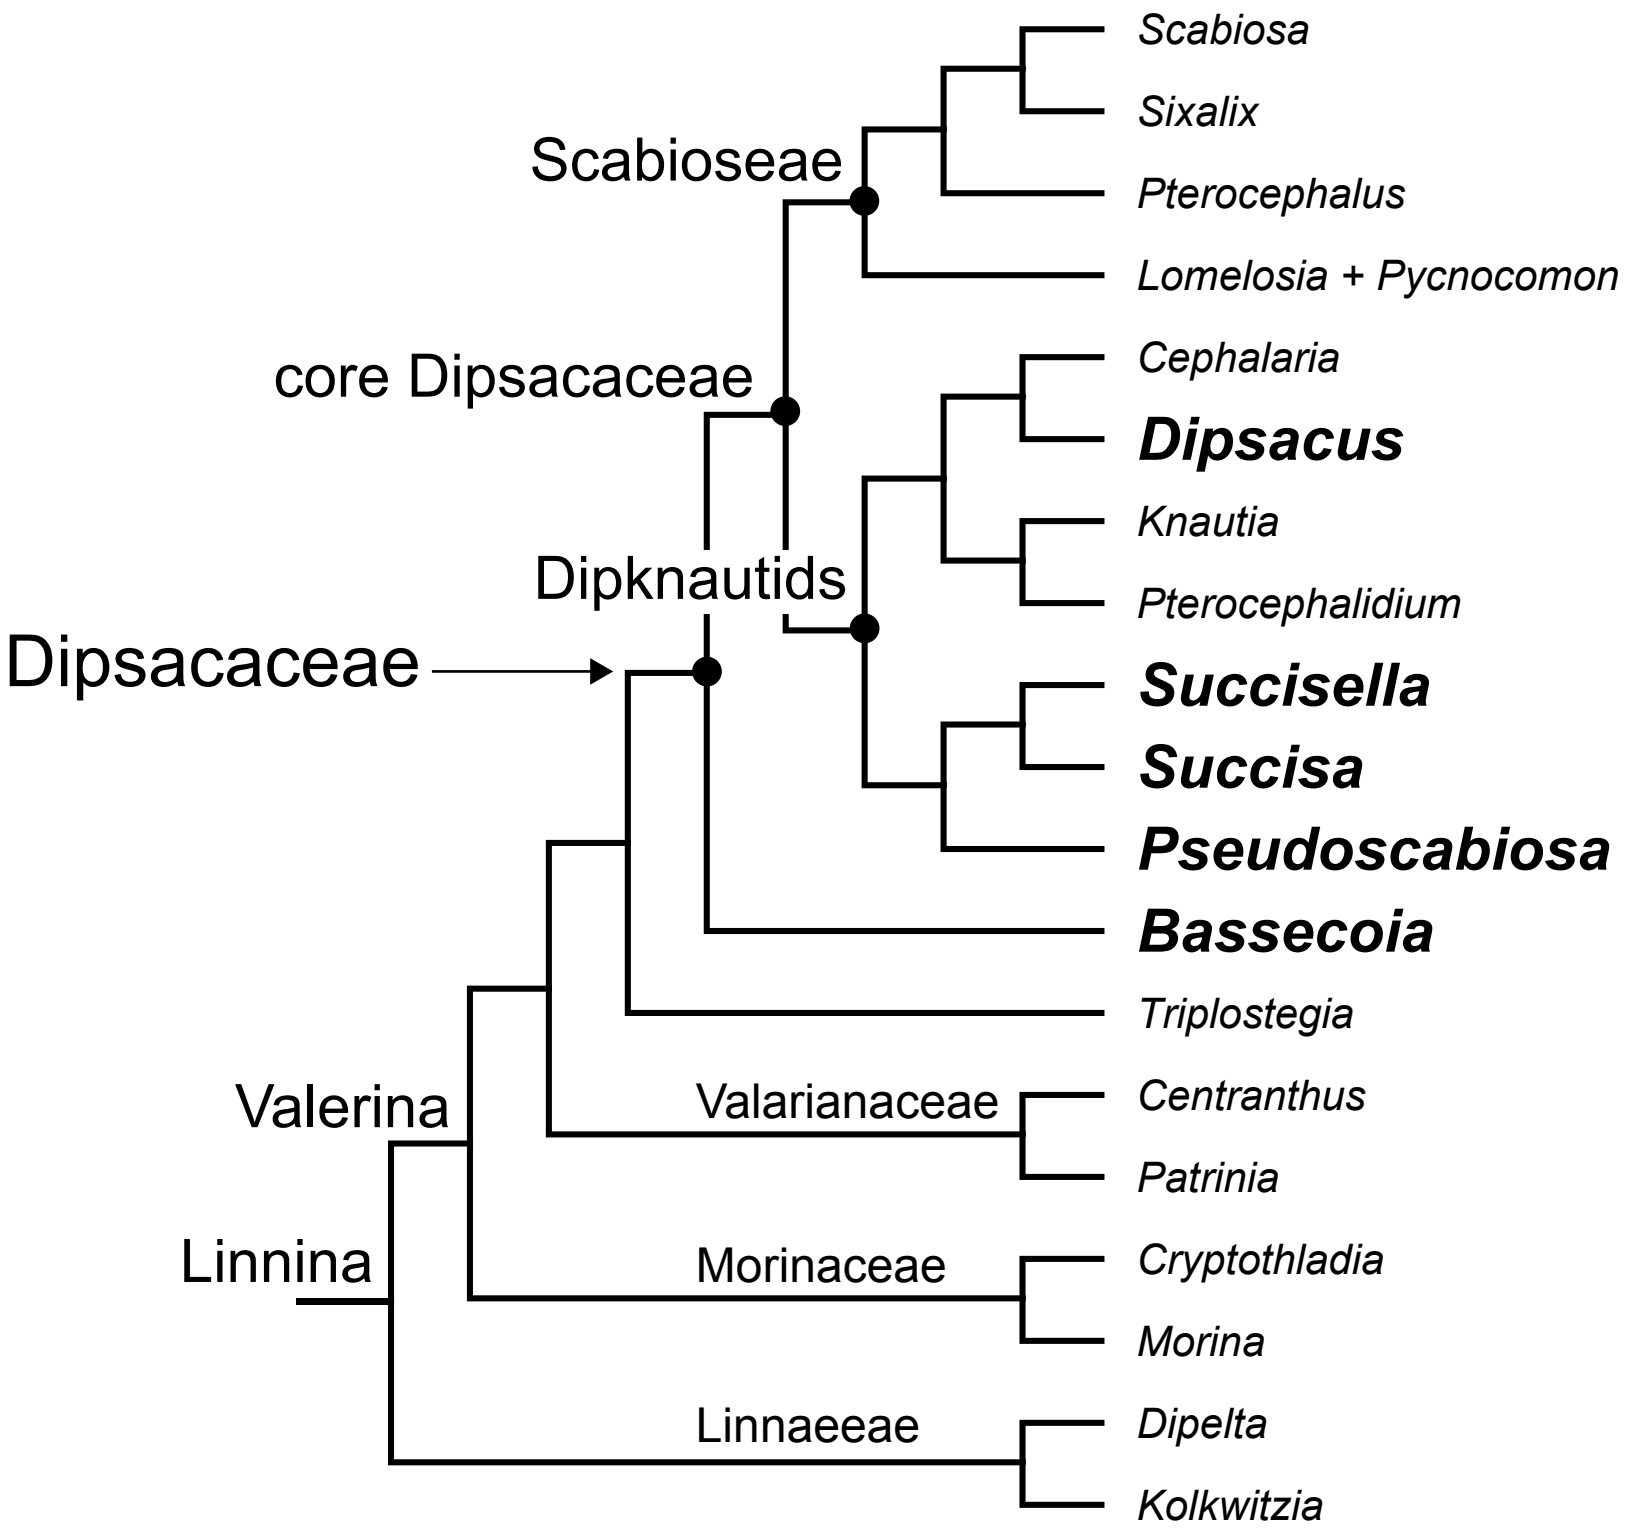

Supplement: 12862_2011_1922_MOESM2_ESM.pdf [file 12862_2011_1922_MOESM2_ESM.pdf]
